# Supplementary material for: Modelization of the Current and Future Habitat Suitability of Rhododendron ferrugineum Using Potential Snow Accumulation
Source: PubMed Central journal article supplement (PMC4732742; doi:10.1371/journal.pone.0147324), 2016-01-29
Supplement: pone.0147324.s002.pdf [file pone.0147324.s002.pdf]

| Scenario            |         | A1B       |           | A2        |           | B1        |           |
|---------------------|---------|-----------|-----------|-----------|-----------|-----------|-----------|
| Period              | Current | 2021-2050 | 2071-2100 | 2021-2050 | 2071-2100 | 2021-2050 | 2071-2100 |
| Annual Tmin (in °C) | 4.7     | + 1.4     | + 2.1     | + 1.0     | + 2.6     | + 1.1     | + 1.3     |
| Annual Tmax (in °C) | 10.3    | +1.9      | + 2.8     | + 1.3     | + 3.2     | + 1.2     | + 1.9     |
| Annual P (in mm)    | 868.2   | - 23.6    | - 34.4    | - 6.3     | + 15.2    | + 57.5    | - 2.7     |
| Winter Tmin (in °C) | -1.1    | + 1.4     | + 2.7     | + 1.3     | + 3.5     | + 1.2     | + 1.8     |
| Winter Tmax (in °C) | 3.5     | + 1.6     | + 3.7     | + 1.4     | + 4.6     | + 1.3     | + 2.4     |
| Winter P (in mm)    | 288.0   | - 35.2    | - 160.1   | + 17.4    | - 174.9   | + 50.2    | - 62.8    |
